# Supplementary material for: Organ-Chips Enhance the Maturation of Human iPSC-Derived Dopamine Neurons
Source: MDPI journal article supplement (doi:10.3390/ijms241814227), 2023-09-18
Supplement: s1 [file s1]

# Organ-Chips Enhance the Maturation of Human iPSC-Derived Dopamine Neurons

Maria G. Otero, Shaughn Bell, Alexander H. Laperle, George Lawless, Zachary Myers, Marian A. Castro, Jaquelyn M. Villalba and Clive N. Svendsen \*

Board of Governors Regenerative Medicine Institute, Cedars-Sinai Medical Center, Los Angeles, CA 90048, USA; mgabriela.otero@cshs.org (M.G.O)

\* Correspondence: clive.svendsen@cshs.org

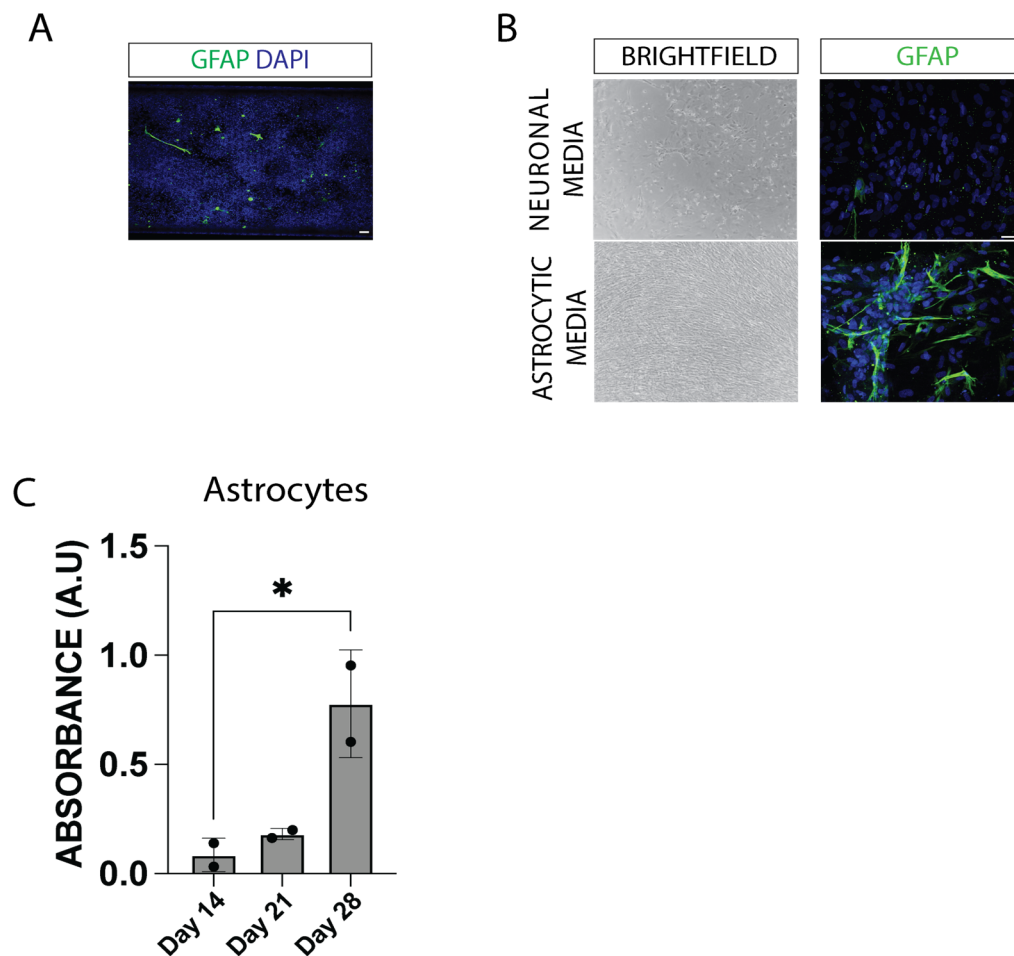

**Figure S1.** Astrocyte numbers are decreased with culture in neuronal media. **(A)** Organ-chip stained with GFAP and counterstained with DAPI at day 28. **(B)** Brightfield and immunocytochemistry of human midbrain astrocytes in neuronal maturation media or astrocyte media (bottom) after 28 days, with GFAP (green) and DAPI (blue). Scale bar 50

$\mu\text{m}$ . (C) Lactate dehydrogenase assay was performed on media from 2D cultures of astrocytes alone in neuronal maturation media at days 14, 21 and 28. N=2 independent experiments with n=1 well of astrocytes per experiment. Samples were quantified in duplicate and averaged. Error bars represent mean  $\pm$  standard deviation (SD). One-Way ANOVA with Tukey post-test \* $p < 0.05$ .

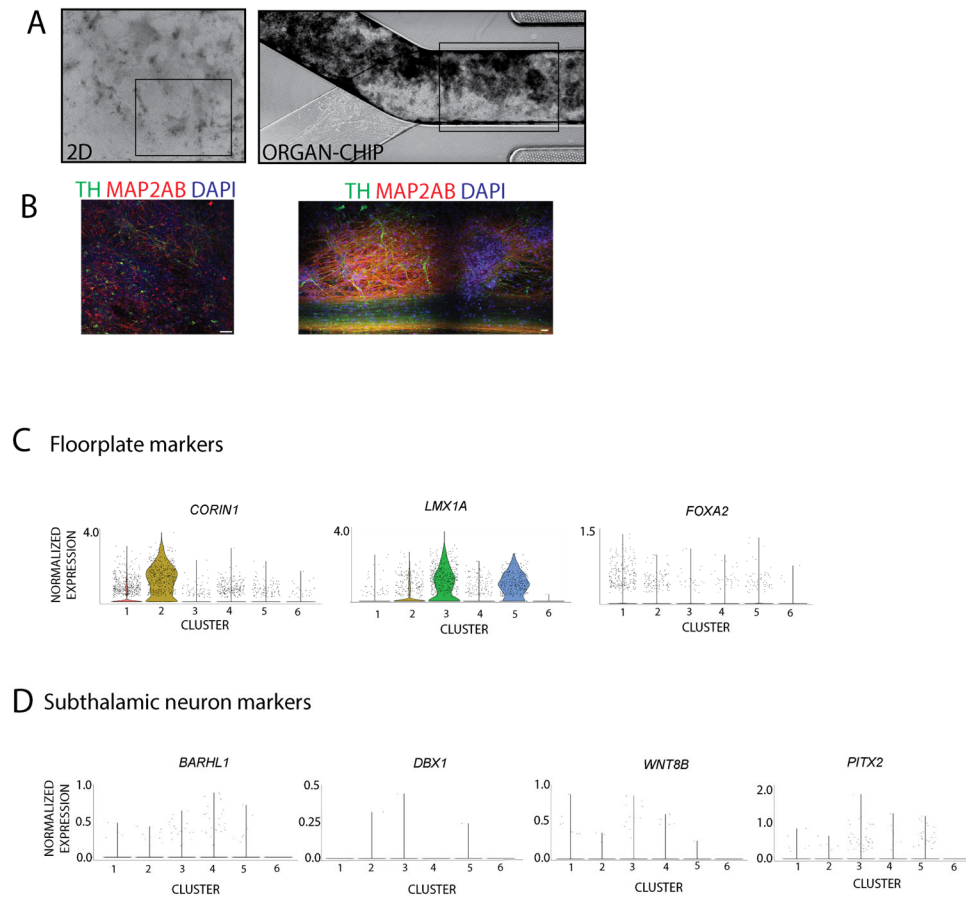

**Figure S2.** snRNA-seq analysis of 2D cultures and organ-chips. Additional 2D and organ chips used for the snRNA-seq experiment shown with (A) brightfield images of live cells and (B) immunocytochemistry for TH (green), MAP2ab (red) with DAPI counterstain (blue). Scale bar 50  $\mu\text{m}$ . (C,D) Violin plots show the expression of (C) Floorplate markers (*LMX1A*, *FOXA2* and *CORIN1*) and (D) Subthalamic neuron markers (*BARHL1*, *DBX1*, *WNT8B* and *PITX2*).
